1 Identification of a unique ZIP transporter involved in zinc uptake via the arbuscular  
2 mycorrhizal fungal pathway.

3

4 Authors: Stephanie J Watts-Williams <sup>1,2,\*</sup>, Stefanie Wege <sup>1,2</sup>, Sunita A Ramesh <sup>2,3</sup>, Oliver  
5 Berkowitz <sup>2,4</sup>, Matthew Gilliam <sup>1,2</sup>, James Whelan <sup>2,4</sup>, Stephen D Tyerman <sup>1,2</sup>.

6

7 Affiliations:

8 <sup>1</sup> The Waite Research Institute and the School of Agriculture, Food and Wine, the University  
9 of Adelaide, Waite Campus, PMB1 Glen Osmond, South Australia, 5064, Australia.

10 <sup>2</sup> The Australian Research Council Centre of Excellence in Plant Energy Biology, Australia.

11 <sup>3</sup> College of Science and Engineering, Flinders University, South Australia, 5042, Australia.

12 <sup>4</sup> Department of Animal Plant and Soil Science, School of Life Science, AgriBio Building, La  
13 Trobe University, Bundoora, Victoria, 3086, Australia.

14 \*Corresponding author: [stephanie.watts-williams@adelaide.edu.au](mailto:stephanie.watts-williams@adelaide.edu.au)

15

16 Key words: Arbuscular mycorrhizal fungi, *Medicago truncatula*, nutrient uptake, zinc, ZIP  
17 transporter.

18 Author contributions: SJWW designed research; SJWW, SW, SAR, OB performed research;  
19 MG, JW, SDT contributed new reagents/analytical tools; SJWW, OB analysed the data;  
20 SJWW, SW, SAR, OB, MG, JW, SDT wrote the paper.

## 21 **Abstract**

22 Low soil zinc (Zn) availability is a limiting factor for crop yield, and increasing Zn content is  
23 a major target for the biofortification of major crops. Arbuscular mycorrhizal (AM) fungi  
24 associate with the roots of most terrestrial plant species and improve the host plant's growth  
25 and nutrition through the mycorrhizal pathway of nutrient uptake. Although the physiology of  
26 Zn uptake through the mycorrhizal pathway is well established, the identity of the molecular  
27 components responsible for Zn transport in the mycorrhizal pathway are unknown.

28 RNA-seq analysis identified the putative Zn transporter gene *MtZIP14* by its marked up-  
29 regulation in *Medicago truncatula* roots when colonised by the AM fungus *Rhizophagus*  
30 *irregularis* under varying soil Zn supply. Expression of GFP-tagged MtZIP14 in roots revealed  
31 that it is exclusively localised to the site of plant-fungal nutrient exchange in cortical cells, the  
32 peri-arbuscular membrane. Expression of MtZIP14 in a yeast mutant lacking Zn transport  
33 function restored growth under low Zn availability. *M. truncatula* *MtZIP14* loss-of-function  
34 mutants had reduced shoot biomass compared to the wild-type when colonised by AM fungi  
35 and grown under low Zn. Vesicular and arbuscular colonisation, but not hyphal colonisation,  
36 were also lower in *mtzip14* mutant plants.

37 Based on these results we propose that MtZIP14 plays a key role in the transport of Zn from  
38 AM fungus to plant across the peri-arbuscular membrane, and *MtZIP14* function is crucial to  
39 plant competitiveness in a low Zn soil.

40

## 41 **Significance statement:**

42 Majority of crop plant species associate with arbuscular mycorrhizal fungi, which can increase  
43 plant nutrient uptake. Improving our knowledge of how Zn is taken up in mycorrhizal plants  
44 will lead to improved plant and human Zn nutrition outcomes. Here, we report a novel plant  
45 transporter with a major role in Zn nutrition of mycorrhizal plants. MtZIP14 is involved in Zn  
46 transport, is exclusively localised to the specialised plant-fungal interface in roots, and  
47 impairment of *MtZIP14* gene function results in negative impacts on both plant growth and Zn  
48 nutrition.

## 49 Introduction

50 Zinc (Zn) is an essential co-factor for >300 enzymes in plants, making it critical for processes  
51 such as carbon fixation, transcription, and production of ATP (1, 2). It is also an essential  
52 micronutrient for humans and Zn deficiency is the fifth leading risk factor for disease in  
53 developing countries with high mortality (3). Zinc is taken up at the plant-soil interface in its  
54 divalent form  $Zn^{2+}$  by the Zn-regulated iron-regulated transporter-like protein (ZIP) family,  
55 which also have a role in the transport of other transition metals (4). ZIP transporters are  
56 involved in cellular Zn homeostasis (5, 6) and the plant response to Zn deficiency (7, 8), while  
57 over-expression of ZIPs can lead to increased tissue Zn concentrations (9, 10). Characteristics  
58 of most ZIP transporters include eight predicted transmembrane-spanning  $\alpha$ -helices, and a  
59 hydrophilic variable region between helix III and IV that contains a potential metal-binding  
60 domain (4). In the model legume *M. truncatula*, 16 predicted ZIP transporters have been  
61 identified through phylogenetic analysis (11) and four of those have been characterised for Zn  
62 transport function by expression in the yeast mutant ZHY3 that lacks Zn transporters (12);  
63 however, the specific roles of these ZIPs *in planta* is currently unknown.

64 The majority of terrestrial plant species form associations with arbuscular mycorrhizal  
65 (AM) fungi; resource exchange is critical to the symbiotic association and typically involves  
66 trade of inorganic nutrients from the fungus and carbon resources from the plant (13). A  
67 primary benefit of colonisation by AM fungi is an improvement in plant growth and nutrition,  
68 particularly of nitrogen (N), phosphorus (P) and Zn nutrition (14, 15). Managed effectively,  
69 AM fungi provide a tool for improved crop Zn nutrition in the field, particularly on Zn-deficient  
70 soils (16). Radioisotope tracing studies have demonstrated that the AM fungus *Rhizophagus*  
71 *irregularis* can contribute as much as 25% of shoot Zn uptake in tomato plants, 24% of grain  
72 Zn in wheat, and 12% in barley (17, 18).

73 Considerable progress has been made toward identifying the components involved in P  
74 and N AM associations (19-21), and a AM-specific plant Cu transporter has been recently  
75 identified (22). In order to fully exploit the AM symbiosis for improved agricultural outcomes  
76 (i.e. crop quantity and quality, biofortification), it is essential that these molecular components  
77 are identified (23, 24). While an AM fungal transporter that facilitates Zn regulation in  
78 extraradical hyphae has been identified (25), no plant Zn transporter has been identified that is  
79 involved in the AM association (23, 26). It has been postulated that an, as yet, unidentified Zn  
80 transporter is exclusively located on the plant-derived peri-arbuscular membrane (PAM)

81 present in AM-colonised root cortical cells, responsible for the import of  $Zn^{2+}$  supplied by the  
82 fungus (19). Here, we propose that MtZIP14 is this postulated transporter.

83 We discovered MtZIP14 through a transcriptomic screen and through functional  
84 characterisation identified it as a novel Zn transport protein exclusively expressed in roots upon  
85 AM colonisation; and is localised to the PAM. Zn transport capacity of MtZIP14 was supported  
86 by heterologous expression in yeast. Examination of *M. truncatula* loss-of-function mutants  
87 demonstrated a negative effect on shoot biomass and AM colonisation of roots, which was  
88 linked to the transport of Zn. We have presented evidence that MtZIP14 has a critical role in  
89 Zn transport by the AM pathway of uptake into plants

90

## 91 **Results**

92 *Identification of MtZIP14 as a candidate Zn transporter specifically expressed in AM colonised*  
93 *roots*

94 To identify genes potentially involved in the mycorrhizal uptake of Zn we performed a RNA-  
95 seq experiment using *Medicago truncatula* grown at different soil Zn concentrations and  
96 inoculated with the AM fungus *Rhizophagus irregularis* compared to mock inoculation (Figure  
97 S1a; Table S1). In order of increasing soil Zn addition (0, 5, 20 mg Zn kg<sup>-1</sup>), there were 589,  
98 201 and 918 genes that increased significantly in abundance with AM colonisation (Figure 1a)  
99 and 221, 33 and 159 genes that decreased in abundance (Figure 1b). At 0 mg kg<sup>-1</sup> added Zn,  
100 the transcripts up-regulated by AM colonisation were associated with the GO terms copper,  
101 iron, and manganese ion binding, confirming the efficiency of the AM inoculation and low  
102 nutrient soil. As expected, non-colonised plants displayed marked changes in transcript  
103 abundance with Zn-deficiency (Zn 0) (135 up, 538 down) in comparison to the AM-colonised  
104 plants (29 up, 37 down).

105 Three lists of candidate genes with a potential role in AM fungal Zn nutrition were  
106 compiled based on their gene annotation as zinc transporter (ZIP), heavy metal transporter or  
107 zinc-binding (Table S2-4). Of all 16 annotated ZIP genes in *M. truncatula*, only one (*MtZIP14*;  
108 *Medtr6g007687*) was exclusively expressed in AM colonised root cells independent of the Zn  
109 concentration, and another gene was up-regulated in all Zn treatments (*MtZIP7*;  
110 *Medtr3g058630*), while all others showed no AM specificity (Figure 1c). A previous study had  
111 shown that the MtZIP7 is a manganese (Mn) transporter (12), suggesting that MtZIP7 is not

112 primarily involved in Zn uptake. The only remaining and most promising candidate, *MtZIP14*,  
113 was uncharacterised, and showed an expression pattern consistent with involvement in the AM  
114 pathway of Zn uptake. Quantitative RT-PCR on samples from an independent experiment  
115 confirmed that *MtZIP14* is almost exclusively expressed in plants that have been colonised by  
116 *R. irregularis* (Figure 1d). Expression of *MtZIP14* was not affected by increasing soil Zn  
117 concentration (0, 5, 10, 20 mg kg<sup>-1</sup> added Zn), and there was a positive ( $R^2 = 0.498$ ), significant  
118 ( $P = 0.03$ ) relationship between the root colonisation by AM fungi and expression of *MtZIP14*,  
119 suggesting that increased colonisation by AM fungi is associated with increased expression of  
120 *MtZIP14* (Figure 1e).

121 Two genes encoding HMA-domain proteins contained in the heavy metal transporter  
122 list were up-regulated by AM colonisation: one in Zn 0 and 5 (*Medtr0041s0140*) and one in all  
123 Zn treatments (*Medtr6g051680*) (Figure S1b). HMA-domain proteins play key roles in  
124 transporting monovalent and divalent ions in plants, and in detoxification (27). In the zinc-  
125 binding candidate list there was a Zn-binding dehydrogenase oxidoreductase gene up-regulated  
126 in all Zn treatments (*Medtr8g035880*) (Figure S1c); Zn-binding alcohol dehydrogenases  
127 catalyse the reduction of acetaldehyde to ethanol, mainly in meristematic tissues such as root  
128 apices under anaerobic conditions (2). The expression of these three genes were determined in  
129 an independent experiment using quantitative RT-PCR; the HMA-domain protein  
130 *Medtr6g051680* was induced by AM colonisation across all Zn conditions (Figure S2a), while  
131 *Medtr0041s0140* was down-regulated by AM colonisation in this experiment (Figure S2b).  
132 The Zn-binding dehydrogenase oxidoreductase gene (*Medtr8g035880*) was exclusively  
133 expressed in AM colonised roots in all the soil Zn treatments (Figure S2c).

134

### 135 *Characterisation of MtZIP14*

136 We concentrated on further characterising *MtZIP14*, as it was the most likely candidate of the  
137 AM up-regulated genes to transport Zn across the PAM. *In silico* analysis predicted a potential  
138 metal-binding domain rich in histidine residues between transmembrane III and IV, similar to  
139 the other ZIP proteins with Zn-transport function characterised in *M. truncatula* (MtZIP1, 2, 5,  
140 6; (12, 28)) (see protein sequence alignment Figure S3).

141 Plant transporters involved in export or import of nutrients and compounds traded  
142 between the fungus and the plant are typically exclusively localised to the specialised PAM.  
143 We therefore investigated the subcellular localisation of MtZIP14 through a C-terminal

144 translational fusion with GFP introduced into *Agrobacterium rhizogenes* ARqua1. The GFP-  
145 tagged construct was introduced into *M. truncatula* A17 through hairy roots transformation  
146 (29); transformed plants were subsequently inoculated with the AM fungus *R. irregularis*.  
147 Confocal imaging revealed GFP fluorescence exclusively localised to the fine branches of  
148 arbuscules in the cortical cells of roots (Figure 2a). This fluorescence pattern suggested that  
149 MtZIP14 expression is specific to colonised cells, and subcellular localisation is specific to the  
150 PAM section of the plant cell plasma membrane. No GFP fluorescence was detected in cells  
151 not colonised with *Rhizophagus irregularis* or in the arbuscules from plants transformed with  
152 the empty vector control (Figure 2b), strongly supporting the conclusion that MtZIP14-GFP is  
153 PAM-localised.

154 To test for the involvement of MtZIP14 in Zn transport, *MtZIP14* was cloned into a  
155 heterologous expression system – yeast (*Saccharomyces cerevisiae*) lacking Zn transporters;  
156 the yeast strain ZHY3 (*zrt1zrt2*; (30, 31)) displays reduced growth under low Zn conditions.  
157 In the EDTA-only YNB media, neither the empty vector control nor the MtZIP14 expressing  
158 ZHY3 yeast strain grew, confirming the growth defect of ZHY3 (*zrt1zrt2*) mutant (Figure 3a).  
159 Interestingly, already in the lowest Zn addition concentration (0.1 mM) where  $Zn^{2+}$  was  
160 available at nanomolar concentration, the MtZIP14-expressing yeast grew, while the empty  
161 vector ZHY3 strain did not (Figure 3b), suggesting that MtZIP14 is able to mediate Zn uptake  
162 from very low external Zn concentrations and is likely a high affinity Zn transporter. In the 0.2  
163 and 0.5 mM added Zn EDTA-YNB (Figure 3c,d), the empty vector displayed slow growth with  
164  $OD_{600}$  increasing after 35 hours, suggesting that higher Zn is sufficient to enable this yeast  
165 strain to survive. Expression of MtZIP14 significantly increased yeast growth over the empty  
166 vector control, which was especially evident at 0.5 mM Zn, where MtZIP14 growth peaked  
167 (Figure 3g). However, growth of the MtZIP14-expressing yeast was reduced at 1 mM added  
168 Zn compared to the empty vector control, suggesting the transport of Zn via MtZIP14 resulted  
169 in Zn influx to toxic concentrations and inhibited growth of the yeast (Figure 3e). At the highest  
170 Zn addition (1.5 mM), the empty vector yeast grew well but the MtZIP14-expressing yeast did  
171 not grow until 35 hours, and growth thereafter was poor, evidencing further the toxicity  
172 hypothesis, and that MtZIP14 may be a dual-affinity transporter (Figure 3f). Growth of ZHY3  
173 on the solid YNB agar media for 96 hours followed the same pattern as the liquid YNB;  
174 MtZIP14-expressing yeast grew in all Zn treatments and best at the 0.5 mM added Zn (Figure  
175 S4a-c), while the empty vector yeast grew well only at 1mM added Zn. The wild-type (WT)  
176 positive control yeast strain (DY1457) grew on all solid agar experimental conditions with Zn



177 addition (Figure S4a-c). This data suggest that MtZIP14 is a membrane protein and able to  
178 facilitate Zn transport into cells.

179 *M. truncatula* plants with Tnt1 retrotransposon insertion in the *MtZIP14* gene were  
180 isolated and analysed. The generated *mtzip14* plants had either no detectable expression of  
181 *MtZIP14* (NF8057; knock-out, KO) or a strongly reduced expression (NF4665; knock-down,  
182 KD) to approximately one third of the out-segregated WT (Figure 5a). As a control, we used  
183 out-segregated WT plants from those two lines, which expressed *MtZIP14* when colonised by  
184 the AM fungus *R. irregularis* while the mock-inoculated plants had no expression, confirming  
185 the results obtained with WT plants in the RNA-seq experiment.

186 We first investigated how the loss of *MtZIP14* function altered the expression of other  
187 *ZIP* transporter genes by analysing 15 additional *MtZIPs* by quantitative RT-PCR from the KO  
188 genotype (NF8057) roots and the corresponding WT. Majority of the *ZIP* genes measured were  
189 highly down-regulated in the AM colonised roots compared to the mock-inoculated roots,  
190 regardless of genotype (i.e. both *mtzip14* and WT were similarly down-regulated in AM  
191 colonised roots) (Figure 4a-l; Table S6). As expected, *MtZIP7* was the only *ZIP* gene found to  
192 be up-regulated by AM colonisation, and we found that it is more highly up-regulated in  
193 *mtzip14*, suggesting a transcriptional impact on *MtZIP7* due to the loss of *MtZIP14* (Figure 4g).  
194 No transcripts were detected for *MtZIP13* or *ZIP16*.

195 We then examined the loss of *MtZIP14* function on the plant and AM fungal  
196 phenotypes. The shoot biomass of both *mtzip14* plant lines was reduced when compared to the  
197 out-segregated WT plants when colonised by *R. irregularis* under Zn deficient conditions  
198 (Figure 5b; Table S7; Table S8), with no significant difference for the mock-inoculated plants.  
199 Shoot Zn concentrations ( $\text{mg kg}^{-1}$ ) were increased by AM inoculation in all plants (Figure S5);  
200 meanwhile, colonised *mtzip14* plants had lower Zn content ( $\mu\text{g Zn per plant}$ ) than the WT  
201 plants, whereas, the mock-inoculated *mtzip14* and WT plants contained similar amounts of Zn  
202 (Figure 5c).

203 For both *mtzip14* lines, vesicular (Figure 5d) and arbuscular (Figure 5e) colonisation  
204 were both lower than the WT, while hyphal colonisation of roots was not significantly different  
205 (Figure 5f). There was no colonisation by AM fungi in the mock-inoculated plants; and shoot  
206 biomass, Zn nutrition and root AM colonisation were comparable in the R108 wild-type plants  
207 and segregated WT lines (Figure S6a-f).

208 We then conducted a principal components analysis (PCA) to analyse all data  
209 simultaneously. PCA revealed a marked effect of *Mycorrhiza* treatment on the plants when all  
210 plant physiological response variables were considered together (Figure S7). However, when  
211 the AMF and Mock data were analysed separately, there was a significant separation based on  
212 *Genotype* in the AM colonised plants only (Figure 6a,b). Furthermore, the loadings show that  
213 WT plants were separated from the *mtzip14* plants by their greater AM colonisation  
214 (arbuscular, vesicular, and hyphal) and shoot Zn contents. Shoot Zn contents were also highly  
215 correlated with vesicular colonisation of the roots, and not to the contents of other nutrients.  
216 Taken together, the PCA provides evidence of the link between AM fungi and plant Zn  
217 nutrition in the context of *MtZIP14* function.

218

## 219 Discussion

### 220 *A role for MtZIP14 in arbuscular mycorrhizal Zn uptake*

221 We have identified MtZIP14 as a plant transport protein with a major role in the uptake of Zn  
222 via the AM pathway of uptake. When grown in a Zn-deficient soil, the WT with functional  
223 *MtZIP14* had a clear benefit over the *mtzip14* KO and KD lines, and WT shoots produced  
224 significantly more biomass. This indicates that the function of *MtZIP14* is critical to the  
225 colonised plant being competitive in a Zn-deficient soil. Furthermore, the PCA indicates that  
226 of all measured nutrients, shoot Zn contents were affected the most by the disruption of  
227 *MtZIP14*, demonstrating a role for *MtZIP14* in mycorrhizal plant Zn uptake. It also suggests  
228 that the non-colonised control plants could not compensate the loss of AM-derived Zn with  
229 increased uptake via the direct pathway (i.e. root uptake from the rhizosphere) to reach similar  
230 Zn contents as the AM-colonised WT plants. Non-colonised plants took up only around ~50 %  
231 of the Zn compared to the colonised WT plants. Gene expression analysis of the KO and KD  
232 lines revealed that the mock-inoculated plants showed higher expression of at least eight *ZIP*  
233 genes compared to the AM colonised plants, including four *ZIP* transporters that have been  
234 shown to transport Zn in yeast previously (MtZIP1, 2, 5, 6); this suggests that expression of  
235 non-PAM *ZIP* genes are generally suppressed in AM plants. Despite the general down-  
236 regulation of *ZIP* transporter genes in the AM-inoculated plants, the Zn concentrations of the  
237 AM inoculated plants were still greater. This might suggest that Zn uptake via the AM pathway  
238 is strongly preferable to the plant, compared to direct uptake.



239 AM colonised *mtzip14* plants accumulated more Zn in their shoots compared to the  
240 non-colonised *mtzip14* plants. This indicates that the *mtzip14* plants still had a Zn uptake  
241 advantage by being colonised by AM fungi, although not to the extent of the WT plants with a  
242 functional *MtZIP14*. The source of the advantage may be another AM-specific transporter,  
243 besides *MtZIP14*, that is able to transport Zn across the peri-arbuscular membrane, which is  
244 also expressed in non-colonised plants and was therefore not identified in our RNA-seq. In  
245 addition, *MtZIP7* was expressed more highly in the *mtzip14* plants than the WT plants, which  
246 may suggest that *MtZIP7* might be able to compensate partially for the loss of *MtZIP14*  
247 function. *MtZIP7* may be able to also transport Zn at a low affinity or low rate, and increased  
248 expression and protein abundance might therefore lead to increased Zn uptake in *mtzip14*.  
249 Alternatively, the effect may be due to indirect environmental effects of the AM symbiosis on  
250 the availability of Zn in the soil (e.g. through exudation that mobilises Zn in soil) that led to  
251 increased plant uptake of Zn via the direct pathway.

252 Loss of *MtZIP14* function affected the colonisation of the roots by *R. irregularis*  
253 suggesting an important role for the transporter in plant-fungus communication. The proportion  
254 of 'functional' AM structures (arbuscules and vesicles) were lower in the *mtzip14* mutant  
255 plants, while hyphal colonisation was not significantly different, indicating that *MtZIP14* is  
256 important for the correct formation of fungal structure within the root, but not the colonisation  
257 event itself. A similar phenotype was observed in plants lacking the AM-specific Pi transporter  
258 gene (*MtPT4*) function (20), and rice plants lacking a symbiotic nitrate transporter gene  
259 (*OsNPF4.5*) function (21). This suggests that the plant-fungal symbiosis is somewhat disrupted  
260 by the loss of *MtZIP14* expression, and that the active sites of nutrient transport (arbuscules),  
261 as well as fungal resource storage units (vesicles), were not able to be produced by the fungus  
262 to the same extent due to this disruption.

263 We observed that expression of *MtZIP14* was not down-regulated in AM-colonised  
264 plants when Zn was in high supply, which correlates with Zn isotope data in tomato showing  
265 that the mycorrhizal pathway of Zn uptake is not suppressed at high Zn concentrations, and is  
266 similar regardless of available Zn in the soil (18). This is in contrast to the expression of the  
267 AM-specific Pi transporter *MtPT4*, which is strongly down-regulated when P is highly  
268 available to the plant (19), and the transport of isotope labelled P via the mycorrhizal pathway  
269 of uptake is likewise suppressed (32). Divalent cation transporters such as ZIPs are often less  
270 selective compared to other nutrient transporters, and uptake via the AM pathway might be  
271 beneficial to the plant, as compared to the direct pathway, which could include the risk of

272 importing unwanted cations such as cadmium (Cd). This may also explain the general down-  
273 regulation of non-PAM ZIPs in AM-colonised plants.

274 We have identified and described a ZIP transporter that has an important role in Zn  
275 transport into plants via the mycorrhizal pathway. This contributes to the development of a  
276 comprehensive plant-AM fungal nutrient exchange model across the PAM, and will stimulate  
277 research into identifying other micronutrient transporters involved in the AM pathway of  
278 nutrient uptake.

279

## 280 **Methods**

### 281 *Plant growth conditions and harvest*

282 The *M. truncatula* plants grown for RNA-sequencing, gene expression, protein localisation and  
283 loss-of-function phenotyping were all grown in similar conditions; briefly, seeds of *Medicago*  
284 *truncatula* ecotypes A17 or R108 (loss-of-function studies only) were surface-sterilised,  
285 surface-scarified lightly with sandpaper, imbibed and germinated on filter paper as previously  
286 described (33).

287 Pre-germinated seedlings were moved into pots inoculated with the AM fungus  
288 *Rhizophagus irregularis* WFVAM10, or mock-inoculated. The growth substrate was a mix of  
289 autoclaved fine sand mixed in a ratio of 9:1 with sieved and autoclaved low nutrient soil from  
290 the Mallala region of South Australia. The final soil/sand mix had a plant-available (DTPA-  
291 extractable) Zn concentration of 0.3 mg Zn kg<sup>-1</sup>. The *R. irregularis* inoculum comprised dry  
292 soil, root pieces, spores and hyphae from a pot culture where *R. irregularis* was previously  
293 cultured on Marigold (*Tagetes patula*) seedlings for 12 weeks. The mock inoculum was  
294 cultured in exactly the same way but without the addition of *R. irregularis* to the culture. For  
295 each pot, 630 g of the sand/soil growth substrate was mixed with 70 g of the AM fungal or  
296 mock inoculant substrate prior to transplantation. Plants were grown in a controlled  
297 environment chamber with day/night conditions set at 24 °C/20 °C and 16/8 hours of light/dark.  
298 Plants were watered until draining with reverse osmosis (RO) water three times per week. In  
299 order to ensure the only limiting plant essential nutrient was Zn, plants were given 10 mL each  
300 of a modified Long-Ashton solution with Zn omitted from the micronutrient cocktail , twice  
301 during the growing period.

302 For the RNA-sequencing there were three soil Zn treatments: no Zn addition, 5 mg Zn  
303 kg<sup>-1</sup>, and 20 mg Zn kg<sup>-1</sup>. Plants were destructively harvested after 33 days, and roots washed  
304 clean with RO water were snap frozen in liquid nitrogen before storage at -80 °C.

305 For the other plant growth experiments, plants were destructively harvested after 35  
306 days. Shoots were separated at the soil level and roots were washed clean before a subsample  
307 of fresh root biomass was moved into 70 % ethanol for determination of AM colonisation. The  
308 shoots and remaining root material were dried at 60 °C for at least 48 hours before dry weights  
309 were determined. Following that, the entire shoot material was homogenised and digested in  
310 4:1 nitric acid:hydrogen peroxide at 125 °C for three hours before being diluted with RO water  
311 and analysed for elemental concentrations of P, Mg, K, Zn, Mn, and Fe by ICP-OES. The fresh  
312 root subsamples were rinsed well and moved into a 10% sodium hydroxide solution at room  
313 temperature for seven days to clear the root cells. Cleared roots were rinsed well then stained  
314 in a 5 % ink in vinegar solution (34) at 60 °C for 10 minutes before being stored in 50 %  
315 glycerol. Colonisation by *R. irregularis* was determined on the stained roots following (35)  
316 whereby arbuscular, vesicular and hyphal root length colonised were each independently  
317 estimated on 100 roots intersects per sample.

318

## 319 **RNA sequencing**

### 320 *RNA isolation and sequencing*

321 For all experiments, a subsample (~100 mg) flash frozen root material was homogenised in 2  
322 mL microcentrifuge tubes with two 2.8 mm ceramic beads per tube, in a bead beater for 2 × 30  
323 seconds (Genogrinder). Total RNA was subsequently isolated using a Plant Total RNA kit  
324 (Sigma) including on-column DNase treatment following the manufacturer's instructions. The  
325 quality and yield of the resulting RNA was analysed using a BioAnalyzer instrument (RNA-  
326 sequencing) or Nandrop (qRT-PCR). Three biological replicates of each treatment were used  
327 in the library preparation for RNA sequencing. RNA-seq libraries were prepared using the  
328 TruSeq Stranded mRNA Library Prep Kit according to the manufacturer's instructions  
329 (Illumina) and sequenced on a NextSeq 550 system (Illumina) as 75bp single-end reads with  
330 an average quality score (Q30) of above 92%. RNA-seq data was deposited at the NCBI  
331 Sequence Read Archive (NCBI SRA) under project ID PRJNA660297.

332

### 333 *Bioinformatics and analysis of differentially expressed genes*

334 Quality control of RNA-seq data was performed using the FastQC software  
335 (<https://www.bioinformatics.babraham.ac.uk/projects/fastqc/>). Transcript abundances as  
336 transcripts per million (TPM) and estimated counts were quantified on a gene level by pseudo-  
337 aligning reads against a k-mer index build from the representative transcript models  
338 downloaded for the *Medicago truncatula* Mt4.0 annotation using a k-mer length of 31 (36)  
339 using the kallisto program with 100 bootstraps (37). Only genes with at least five counts were  
340 included in the further analysis. The program sleuth with a Wald test was used to test for  
341 differential gene expression (38). Differentially expressed genes (DEGs) were calculated as the  
342 log fold change (FC) of the mean *R. irregularis*-inoculated plants to the mock-inoculated  
343 plants, for each soil Zn treatment, respectively. Genes were considered as differentially  
344 expressed with a  $|\log_2(\text{fold change})| > 2$  and false discovery rate (FDR)  $< 0.05$ .

345 For further analyses, hierarchical clustering and generation of heat maps the Partek  
346 Genomics software suite version 6.16 (Partek Incorporated, <http://www.partek.com/>) was used.  
347 Venn diagrams were constructed (<http://bioinformatics.psb.ugent.be/webtools/Venn/>) to  
348 visualise the separation of DEGs into the three Zn treatments. GO term enrichment analysis of  
349 the DEGs was completed using the agriGO tool  
350 (<http://bioinfo.cau.edu.cn/agriGO/analysis.php>).

351

### 352 **Characterisation of *MtZIP14***

#### 353 *Expression of MtZIP14 in roots colonised by AM fungi*

354 To confirm the expression pattern of *MtZIP14* in AM-inoculated compared with mock-  
355 inoculated plants, qRT-PCR was performed on material from an independently conducted  
356 experiment (see 39). Briefly, *Medicago truncatula* A17 was inoculated with *R. irregularis* or  
357 mock-inoculated and grown in a soil with one of four different soil Zn concentrations. Total  
358 root RNA was isolated as described above and expression of *MtZIP14* was measured by qRT-  
359 PCR and normalised to the geometric mean of three housekeeping genes following (40) (Table  
360 S5).

361

#### 362 *Localisation of MtZIP14 in planta*

363 A DNA fragment of the full-length MtZIP14 (Medtr6g007687.1) genomic region and 1.9 kb  
364 upstream of the ATG, but without the stop codon or 3' UTR, was cloned into the pENTR-D-  
365 TOPO vector as above, confirmed by Sanger sequencing, and recombined into the Gateway-  
366 compatible C-terminal GFP-tagged plant expression vector pMDC107 by LR reaction.  
367 Successful recombination into the expression vector was confirmed by enzyme digestion and  
368 Sanger sequencing. The resulting pMtZIP14:MtZIP14-GFP construct and the empty  
369 pMDC107 vector were respectively transformed in *Agrobacterium rhizogenes* ARqual,  
370 confirmed by colony PCR, and used for hairy root transformation of *M. truncatula* cv. A17  
371 plants.

372 Hairy roots of *M. truncatula* A17 plants were transformed with the constructs  
373 (MtZIP14-GFP and empty vector, respectively) following Floss, Schmitz, Starker, Gantt and  
374 Harrison (29) and grown on F-media containing 25  $\mu\text{g mL}^{-1}$  kanamycin for three weeks.  
375 Seedlings with roots developing from the inoculation site were then moved into sterilised  
376 zeolite substrate for 10 days and finally to the soil/sand substrate inoculated with *R. irregularis*  
377 (described above).

378 At 21 to 26 days post-inoculation with *R. irregularis* the plants were gently removed  
379 from the substrate and roots washed free of any sand/soil. Roots were examined under a Nikon  
380 SMZ25 stereomicroscope with a 2 $\times$  objective for evidence of AM colonisation (external hyphal  
381 penetration, swelling) sectioned transversely into 1-2 mm pieces, then longitudinally, before  
382 mounting onto slides for further viewing on the confocal microscope. Images were captured  
383 with a Nikon A1R Confocal Laser-Scanning Microscope, using the 60 $\times$  Plan Apo VC WI  
384 objective; excitation 488 nm, emission collection 500-550 nm; an image using the transmission  
385 detector was simultaneously captured.

386 Three independent hairy root transformation events were conducted over a five-month  
387 period, with at least six plants assessed from each event. The images presented are  
388 representative of the GFP and empty vector constructs, respectively.

389

#### 390 *Complementation of a Zn-deficient yeast strain with MtZIP14*

391 The complete mRNA sequence of MtZIP14 cv. A17 from ATG to stop codon was amplified  
392 using Phusion High-fidelity DNA polymerase, with the Gateway-specific sequence (CACC)  
393 added to the 5' end of the forward primer. The resulting product was cloned into the pENTR-

394 D-TOPO Gateway-compatible entry vector, transformed by heat shock into *E. coli* DH5 $\alpha$   
395 competent cells, and sequenced to confirm before LR reaction to recombine into the yeast  
396 expression vector pDEST52. Successful recombination was confirmed by enzyme digestion.  
397 Then, the pDEST52:MtZIP14 construct and empty pDEST52 vector were respectively  
398 transformed into the yeast strain ZHY3 (*zrt1zrt2* mutated) and the wild-type yeast strain  
399 DY1457 (both kindly provided by Prof. D. Eide) using the lithium-acetate transformation  
400 method (41). Transformants were selected on YNB minus uracil plus 2 % glucose plates.

401 For the yeast growth studies, the ZHY3 yeast strain expressing empty vector and the  
402 MtZIP14 constructs were grown overnight in liquid yeast nitrogen base (YNB) -uracil with 2  
403 % galactose. Cells were pelleted, washed three times in sterile water and resuspended in YNB  
404 -uracil with 2 % galactose media supplemented with 1 mM EDTA and one of 0.1, 0.2, 0.5, 1.0  
405 or 1.5 mM Zn as ZnSO $_4$  to an OD of  $\sim$ 0.23. The EDTA was added for the purpose of chelating  
406 the existing Zn in the media (400  $\mu$ g Zn L $^{-1}$  according to manufacturer) and allowed for the  
407 creation of media completely devoid of Zn (following 12). The availability of free Zn $^{2+}$  in the  
408 EDTA-YNB media was predicted using the Visual MINTEQ software  
409 (<https://vminteq.lwr.kth.se/>). Without any addition of ZnSO $_4$ , the EDTA-YNB media was  
410 predicted to have approximately 0.001 nM free Zn $^{2+}$ , and the addition of 0.1 mM ZnSO $_4$  yielded  
411 just 0.048 nM free Zn $^{2+}$ . At the highest ZnSO $_4$  addition of 1.5 mM, the EDTA-YNB media had  
412 a predicted free Zn $^{2+}$  availability of 237.86  $\mu$ M.

413 An aliquot of 150  $\mu$ l of cells was placed into a 96 well microplate for each treatment (3  
414 replicates of each) and the plate sealed with a sterile film. The microplate was placed into a  
415 microplate reader (BMG Omega) and growth of the yeast strains was quantified over 66 h.  
416 Solid agar plates were prepared from YNB -uracil with 2% galactose and 1 mM EDTA with  
417 the addition of Zn at 0, 0.2, 0.5 or 1 mM ZnSO $_4$ . The wild-type and ZHY3 yeast empty vector  
418 constructs and the ZHY3-MtZIP14 construct were cultured overnight in 5 mL of YNB -uracil  
419 with 2% galactose. The resulting cultures were rinsed well with sterile water three times before  
420 being resuspended in 3 mL sterile water and diluted to an OD $_{600}$  of 0.5, 0.1, 0.01 and 0.001.  
421 For each yeast construct, 5  $\mu$ L of each dilution was spotted onto the prepared EDTA-YNB agar  
422 plates, and onto control YNB -uracil with 2% galactose or 2% glucose (no EDTA) plates and  
423 placed inverted in a 28 °C incubator for 2-4 days. The experimental plates were replicated three  
424 times. The plates with wild-type yeast harbouring the empty vector construct were  
425 photographed after two days and the ZHY3 yeast harbouring the empty vector or MtZIP14  
426 constructs after four days, due to faster growth of the WT strain.



427

#### 428 *Phenotyping of loss-of-function MtZIP14 mutants*

429 To find the *MtZIP14* gene sequence in the *M. truncatula* R108 ecotype, the *MtZIP14* A17  
430 ecotype mRNA sequence was compared using a BLAST online tool  
431 ([http://www.medicagohapmap.org/tools/r108\\_blastform](http://www.medicagohapmap.org/tools/r108_blastform)).

432 Line numbers NF8057 and NF4665 from the Noble Foundation's *M. truncatula* Tnt1  
433 insertion mutant collection were predicted to have an insertion in the *MtZIP14* gene as per  
434 BLAST analysis of R108 sequence in the Tnt1 insertion collection database ([https://medicago-](https://medicago-mutant.noble.org/mutant/database.php)  
435 [mutant.noble.org/mutant/database.php](https://medicago-mutant.noble.org/mutant/database.php)). The NF8057 line (referred to in text and figures as  
436 “knock-out”, KO) has a Tnt1 insertion in the first exon of the *MtZIP14* gene sequence,  
437 approximately 250 nucleotides downstream of the ATG. The NF4665 line (referred to in text  
438 and figures as “knock-down”, KD) has a Tnt1 insertion in the first exon approximately 496  
439 nucleotides downstream of the ATG. Genotyping of the R1 plants supplied by the Noble  
440 Foundation using gene-specific and Tnt1-specific primers identified a number of plants  
441 homozygous for the Tnt1 insertion, which were subsequently genetically backcrossed using  
442 the keel petal incision method to the R108 wild-type (WT) background (following 42). The  
443 resulting heterozygous progeny were grown and allowed to self-pollinate, then homozygous  
444 and out-segregated WT progeny were isolated for use in subsequent experiments.

445 To investigate the *mtzip14* phenotype, *M. truncatula* R108 *mtzip14*, the respective out-  
446 segregated WT for each NF line, and R108 wild-type plants were inoculated with *R. irregularis*  
447 or with mock inoculum and grown in a Zn-deficient soil, as described above. Each treatment  
448 was biologically replicated six times. Plants were harvested 35 days after transplantation;  
449 measurements of dry shoot and root biomass, AM colonisation (arbuscular, vesicular, hyphal),  
450 and shoot Zn concentration were taken. Flash frozen root samples were taken from one  
451 experiment for the isolation of RNA and gene expression analysis by qRT-PCR (oligo  
452 sequences in Table S5). The phenotyping experiment was conducted in an identical manner a  
453 total of three times over four months.

454

#### 455 *Statistical analysis and data presentation*

456 A linear mixed effects model was employed to analyse the plant biomass, Zn nutrition and AM  
457 colonisation data using the “lme” function within the “nlme” package in R version 4.0.2 (R

458 Core Team 2019). *Mycorrhiza* and *Genotype* (and their interaction) were included as fixed  
459 effects and a random term for *Experiment* was included in order to block the data by the  
460 experiment it originated from. This allowed for data from all three growth experiments to be  
461 included in the model while accounting for effects of the individual *Experiment*. The NF4665  
462 (knock-down) and NF8057 (knock-out) *Tnt1* lines were statistically analysed separately. For  
463 the NF8057 gene expression data collected from one experiment, a two-way analysis of  
464 variance (ANOVA) was employed with *Mycorrhiza* and *Genotype* as the factors. Where the  
465 interaction or main effects was significant ( $P < 0.05$ ), the “lsmeans” package and function were  
466 used to conduct Tukey’s HSD *post hoc* pairwise comparisons between the treatments and  
467 identify any significant differences. These are presented as letters on the relevant figures.

468 The *Tnt1* plant physiological and gene expression data are presented as box-and-  
469 whisker plots (one representative experiment presented in main figures, boxplots from all three  
470 experiment available in Figure S8a-f), and were generated using the “ggboxplot” function  
471 within the “ggpubr” package with “jitter” added to visualise the individual data points and  
472 outliers. A principal components analysis (PCA) was undertaken using the “PCA” function in  
473 the “FactoMineR” package, including all of the available plant biomass, AM colonisation and  
474 nutrient content data to visualise the effect of *Mycorrhiza* and *Genotype* on the data. Following  
475 that, the AMF and Mock data were split, and PCA conducted on each dataset separately to  
476 visualise the effect of *Genotype*. The PCA biplots were drawn using the “factoextra” package  
477 and the scores coloured by levels of *Mycorrhiza* (AMF or Mock) or *Genotype* (*mtzip14* or WT);  
478 the group mean was also computed for each level, and a 95 % confidence ellipse drawn around  
479 the mean to determine significant differences between groups.

480 Acknowledgements:

481 SJWW acknowledges the University of Adelaide Ramsay Fellowship and the Australasian  
482 Mycological Society research grant for support. We thank Gwen Mayo and Adelaide  
483 Microscopy for support with imaging. All authors acknowledge the Australian Research  
484 Council Centre of Excellence in Plant Energy Biology (CE1400008) for support. We wish to  
485 thank Dr Armando Bravo, Prof. Maria Harrison, Prof. Timothy Cavagnaro, Dr Apriadi  
486 Situmorang, and Dr Yoshihiro Kobae for valuable discussions, Prof. David Eide for access to  
487 the yeast strains and Dr Jianqi Wen for access to the *M. truncatula* Tnt1 insertion mutant  
488 collection. We would like to thank Asha Haslem for technical assistance and the La Trobe  
489 University Genomics Platform for access to next-generation sequencing equipment.

490 The *Medicago truncatula* plants utilized in this research project, which are jointly owned by  
491 the Centre National De La Recherche Scientifique, were obtained from Noble Research  
492 Institute, LLC (successor-by-conversion to The Samuel Roberts Noble Foundation, Inc.,  
493 effective May 1, 2017) and were created through research funded, in part, by a grant from the  
494 National Science Foundation, NSF-0703285.

495

496  
497  
498  
499  
500  
501  
502  
503  
504  
505  
506  
507  
508  
509  
510  
511  
512  
513  
514  
515  
516  
517  
518  
519  
520  
521  
522  
523  
524  
525  
526  
527  
528  
529  
530  
531  
532  
533  
534  
535  
536  
537  
538  
539  
540  
541  
542  
543  
544  
545  
546  
547  
548  
549

## References

1. Broadley MR, White PJ, Hammond JP, Zelko I, & Lux A (2007) Zinc in plants. *New Phytol.* 173(4):677-702.
2. Marschner H (2012) *Mineral Nutrition of Higher Plants*.
3. Brown KH & Wuehler SE (2000) *Zinc and human health: results of recent trials and implications for program interventions and research* (Micronutrient Initiative).
4. Gueriot ML (2000) The ZIP family of metal transporters. *Biochim. Biophys. Acta* 1465(1–2):190-198.
5. Milner MJ, Seamon J, Craft E, & Kochian LV (2013) Transport properties of members of the ZIP family in plants and their role in Zn and Mn homeostasis. *J. Exp. Bot.* 64.
6. Grotz N & Gueriot ML (2006) Molecular aspects of Cu, Fe and Zn homeostasis in plants. *Biochim. Biophys. Acta* 1763.
7. Pedas P, Schjoerring JK, & Husted S (2009) Identification and characterization of zinc-starvation-induced ZIP transporters from barley roots. *Plant Physiol. Biochem.* 47(5):377-383.
8. Grotz N, *et al.* (1998) Identification of a family of zinc transporter genes from Arabidopsis that respond to zinc deficiency. *Proceedings of the National Academy of Sciences* 95(12):7220-7224.
9. Tiong J, *et al.* (2014) HvZIP7 mediates zinc accumulation in barley (*Hordeum vulgare*) at moderately high zinc supply. *New Phytol.* 201(1):131-143.
10. Ramegowda Y, *et al.* (2013) Expression of a rice Zn transporter, OsZIP1, increases Zn concentration in tobacco and finger millet transgenic plants. *Plant Biotechnology Reports* 7(3):309-319.
11. Abreu I, *et al.* (2017) *Medicago truncatula* Zinc-Iron Permease6 provides zinc to rhizobia-infected nodule cells. *Plant, Cell Environ.* 40(11):2706-2719.
12. López-Millán A-F, Ellis D, & Grusak M (2004) Identification and characterization of several new members of the ZIP family of metal ion transporters in *Medicago truncatula*. *Plant Mol. Biol.* 54(4):583-596.
13. Garcia K, Doidy J, Zimmermann SD, Wipf D, & Courty P-E (2016) Take a Trip Through the Plant and Fungal Transportome of Mycorrhiza. *Trends Plant Sci.* 21(11):937-950.
14. Cavagnaro TR (2008) The role of arbuscular mycorrhizas in improving plant zinc nutrition under low soil zinc concentrations: a review. *Plant Soil* 304(1-2):315-325.
15. Smith SE & Read DJ (2008) *Mycorrhizal symbiosis* (Academic Press, New York) Third Ed p 605.
16. Ercoli L, Schübler A, Arduini I, & Pellegrino E (2017) Strong increase of durum wheat iron and zinc content by field-inoculation with arbuscular mycorrhizal fungi at different soil nitrogen availabilities. *Plant Soil* 419(1):153-167.
17. Coccina A, *et al.* (2019) The mycorrhizal pathway of zinc uptake contributes to zinc accumulation in barley and wheat grain. *BMC Plant Biol.* 19(1):133.
18. Watts-Williams S, Smith F, McLaughlin M, Patti A, & Cavagnaro T (2015) How important is the mycorrhizal pathway for plant Zn uptake? *Plant Soil* 390(1):157-166.
19. Ferrol N, Azcón-Aguilar C, & Pérez-Tienda J (2019) Review: Arbuscular mycorrhizas as key players in sustainable plant phosphorus acquisition: An overview on the mechanisms involved. *Plant Sci.* 280:441-447.
20. Javot H, Penmetza RV, Terzaghi N, Cook DR, & Harrison MJ (2007) A *Medicago truncatula* phosphate transporter indispensable for the arbuscular mycorrhizal symbiosis. *Proceedings of the National Academy of Sciences* 104(5):1720-1725.
21. Wang S, *et al.* (2020) Functional analysis of the OsNPF4.5 nitrate transporter reveals a conserved mycorrhizal pathway of nitrogen acquisition in plants. *Proceedings of the National Academy of Sciences* 117(28):16649.
22. Senovilla M, *et al.* (2020) MtCOPT2 is a Cu<sup>+</sup> transporter specifically expressed in *Medicago truncatula* mycorrhizal roots. *Mycorrhiza*.
23. Ruytinx J, *et al.* (2019) Micronutrient transport in mycorrhizal symbiosis; zinc steals the show. *Fungal Biology Reviews*.

- 550 24. Schroeder JI, *et al.* (2013) Using membrane transporters to improve crops for sustainable food  
551 production. *Nature* 497(7447):60-66.
- 552 25. Gonzalez-Guerrero M, *et al.* (2005) Characterization of a *Glomus intraradices* gene encoding  
553 a putative Zn transporter of the cation diffusion facilitator family. *Fungal Genet. Biol.*  
554 42(2):130-140.
- 555 26. Ferrol N, Tamayo E, & Vargas P (2016) The heavy metal paradox in arbuscular mycorrhizas:  
556 from mechanisms to biotechnological applications. *J. Exp. Bot.* 67(22):6253-6265.
- 557 27. Shi W, *et al.* (2019) Physiological and molecular mechanisms of heavy metal accumulation in  
558 nonmycorrhizal versus mycorrhizal plants. *Plant, Cell Environ.* 42(4):1087-1103.
- 559 28. Stephens BW, Cook DR, & Grusak MA (2011) Characterization of zinc transport by divalent  
560 metal transporters of the ZIP family from the model legume *Medicago truncatula*. *BioMetals*  
561 24.
- 562 29. Floss DS, Schmitz AM, Starker CG, Gantt JS, & Harrison MJ (2013) Gene Silencing in  
563 *Medicago truncatula* Roots Using RNAi. *Legume Genomics: Methods and Protocols*, ed Rose  
564 RJ (Humana Press, Totowa, NJ), pp 163-177.
- 565 30. Zhao H & Eide D (1996) The yeast ZRT1 gene encodes the zinc transporter protein of a high-  
566 affinity uptake system induced by zinc limitation. *Proceedings of the National Academy of*  
567 *Sciences* 93(6):2454.
- 568 31. Zhao H & Eide D (1996) The ZRT2 Gene Encodes the Low Affinity Zinc Transporter in  
569 *Saccharomyces cerevisiae*. *J. Biol. Chem.* 271(38):23203-23210.
- 570 32. Watts-Williams SJ, Jakobsen I, Cavagnaro TR, & Grønlund M (2015) Local and distal effects  
571 of arbuscular mycorrhizal colonization on direct pathway Pi uptake and root growth in  
572 *Medicago truncatula*. *J. Exp. Bot.* 66(13):4061-4073.
- 573 33. Watts-Williams SJ, Tyerman SD, & Cavagnaro TR (2017) The dual benefit of arbuscular  
574 mycorrhizal fungi under soil zinc deficiency and toxicity: linking plant physiology and gene  
575 expression. *Plant Soil* 420(1-2):375-388.
- 576 34. Vierheilig H, Coughlan AP, Wyss U, & Piche Y (1998) Ink and vinegar, a simple staining  
577 technique for arbuscular-mycorrhizal fungi. *Appl. Environ. Microbiol.* 64(12):5004-5007.
- 578 35. McGonigle T, Miller M, Evans D, Fairchild G, & Swan J (1990) A new method which gives  
579 an objective measure of colonization of roots by vesicular—arbuscular mycorrhizal fungi. *New*  
580 *Phytol.* 115(3):495-501.
- 581 36. Tang H, *et al.* (2014) An improved genome release (version Mt4.0) for the model legume  
582 *Medicago truncatula*. *BMC Genomics.* 15:312. 10.1186/1471-2164-15-312.
- 583 37. Bray NL, Pimentel H, Melsted P, & Pachter L (2016) Near-optimal probabilistic RNA-seq  
584 quantification. *Nat Biotech* 34(5):525-527.
- 585 38. Pimentel H, Bray NL, Puente S, Melsted P, & Pachter L (2017) Differential analysis of RNA-  
586 seq incorporating quantification uncertainty. *Nat Meth* 14(7):687-690.
- 587 39. Nguyen TD, Cavagnaro TR, & Watts-Williams SJ (2019) The effects of soil phosphorus and  
588 zinc availability on plant responses to mycorrhizal fungi: a physiological and molecular  
589 assessment. *Scientific Reports* 9(1):14880.
- 590 40. Vandesompele J, *et al.* (2002) Accurate normalization of real-time quantitative RT-PCR data  
591 by geometric averaging of multiple internal control genes. *Genome Biology*  
592 3(7):research0034.0031.
- 593 41. Gietz RD & Woods RA (2002) Transformation of yeast by lithium acetate/single-stranded  
594 carrier DNA/polyethylene glycol method. *Methods Enzymol.*, eds Guthrie C & Fink GR  
595 (Academic Press), Vol 350, pp 87-96.
- 596 42. Veerappan V, *et al.* (2014) Keel petal incision: a simple and efficient method for genetic  
597 crossing in *Medicago truncatula*. *Plant Methods* 10(1):11.

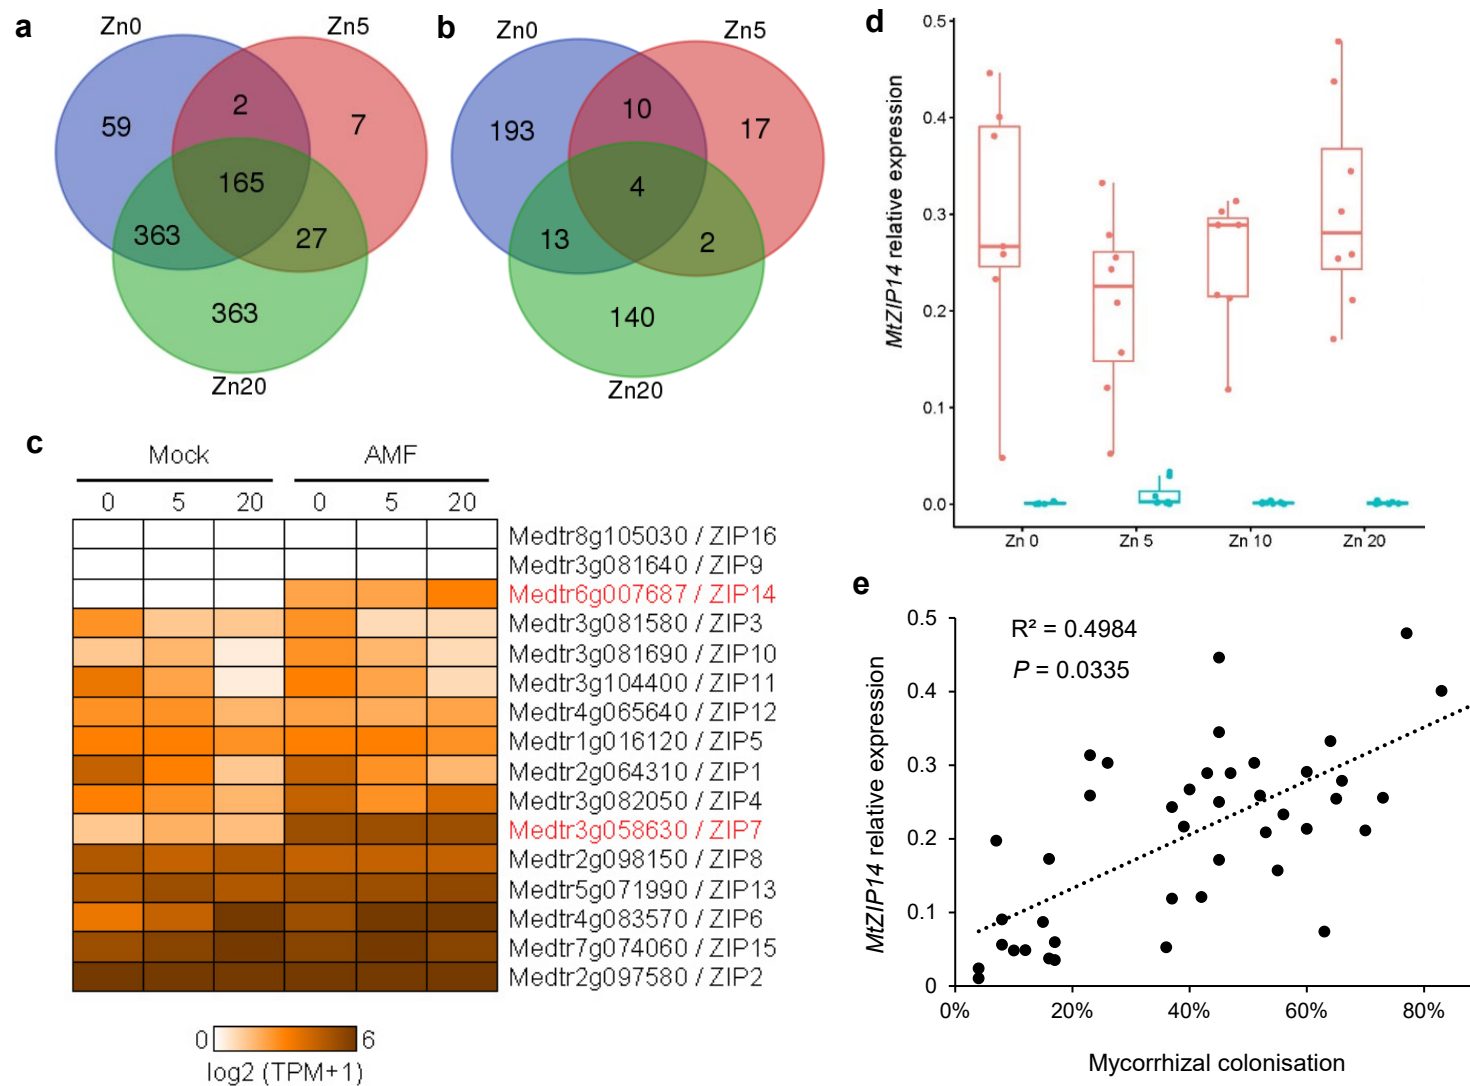

**Figure 1.** Numbers of significantly up-regulated (a) and down-regulated (b) *Medicago truncatula* A17 genes by *Rhizophagus irregularis* colonisation, expression of 16 genes annotated as ZIP transporters (c) split into three soil Zn addition treatments: Zn0 no addition; Zn5 5 mg kg<sup>-1</sup> addition; Zn20 20 mg kg<sup>-1</sup> addition. Genes highly up-regulated in AM colonised plants across all three Zn addition treatments are highlighted in red. Expression of *MtZIP14* in the roots of *Rhizophagus irregularis*-inoculated (pink) and mock-inoculated (blue) plants grown at four soil Zn additions (d) and relationship between root length colonised by AM fungal structures assessed by microscopy and *MtZIP14* gene expression (e). Gene expression is calculated as the gene-of-interest relative to the geometric mean of three housekeeping genes (Table S5).



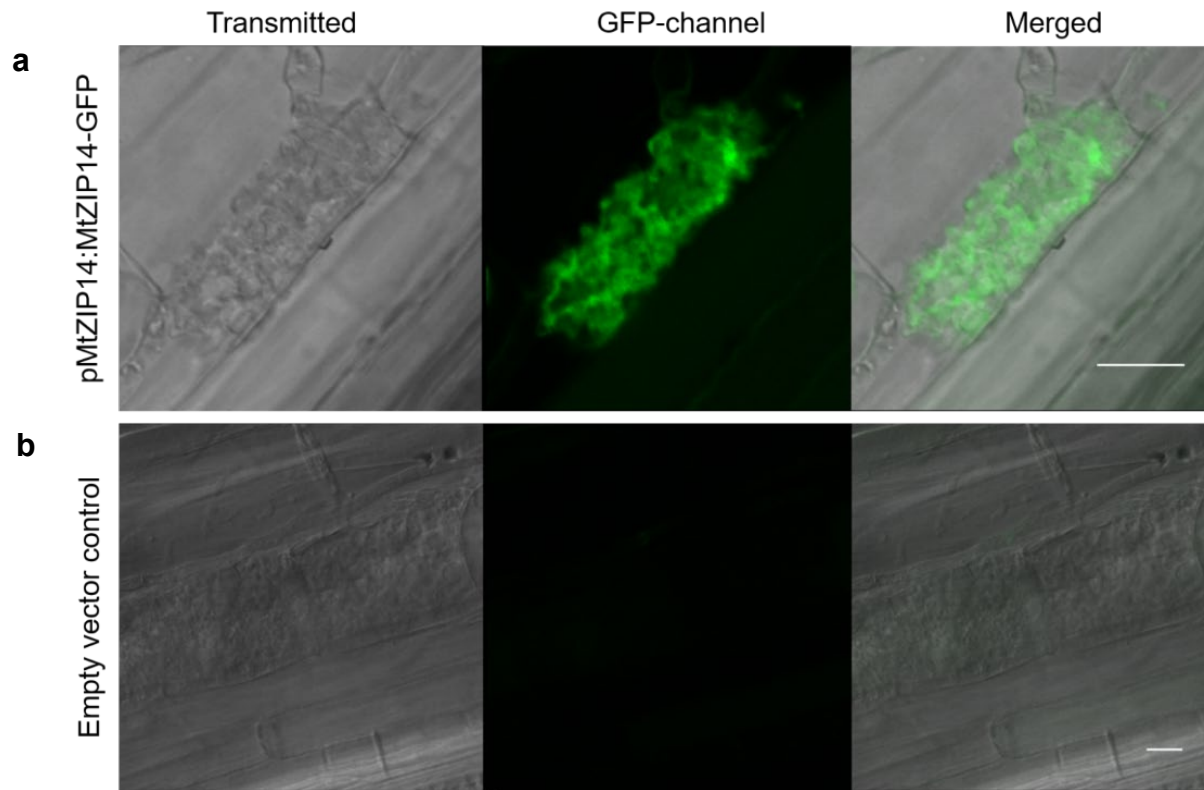

**Figure 2.** Confocal laser-scanning microscopy images of C-terminally GFP-tagged MtZIP14, with fluorescence shown in green (a), and the empty vector control (b) in cortical cells of *Medicago truncatula* A17 containing arbuscules formed by *Rhizophagus irregularis* colonisation. Scale bar is 10  $\mu$ m.

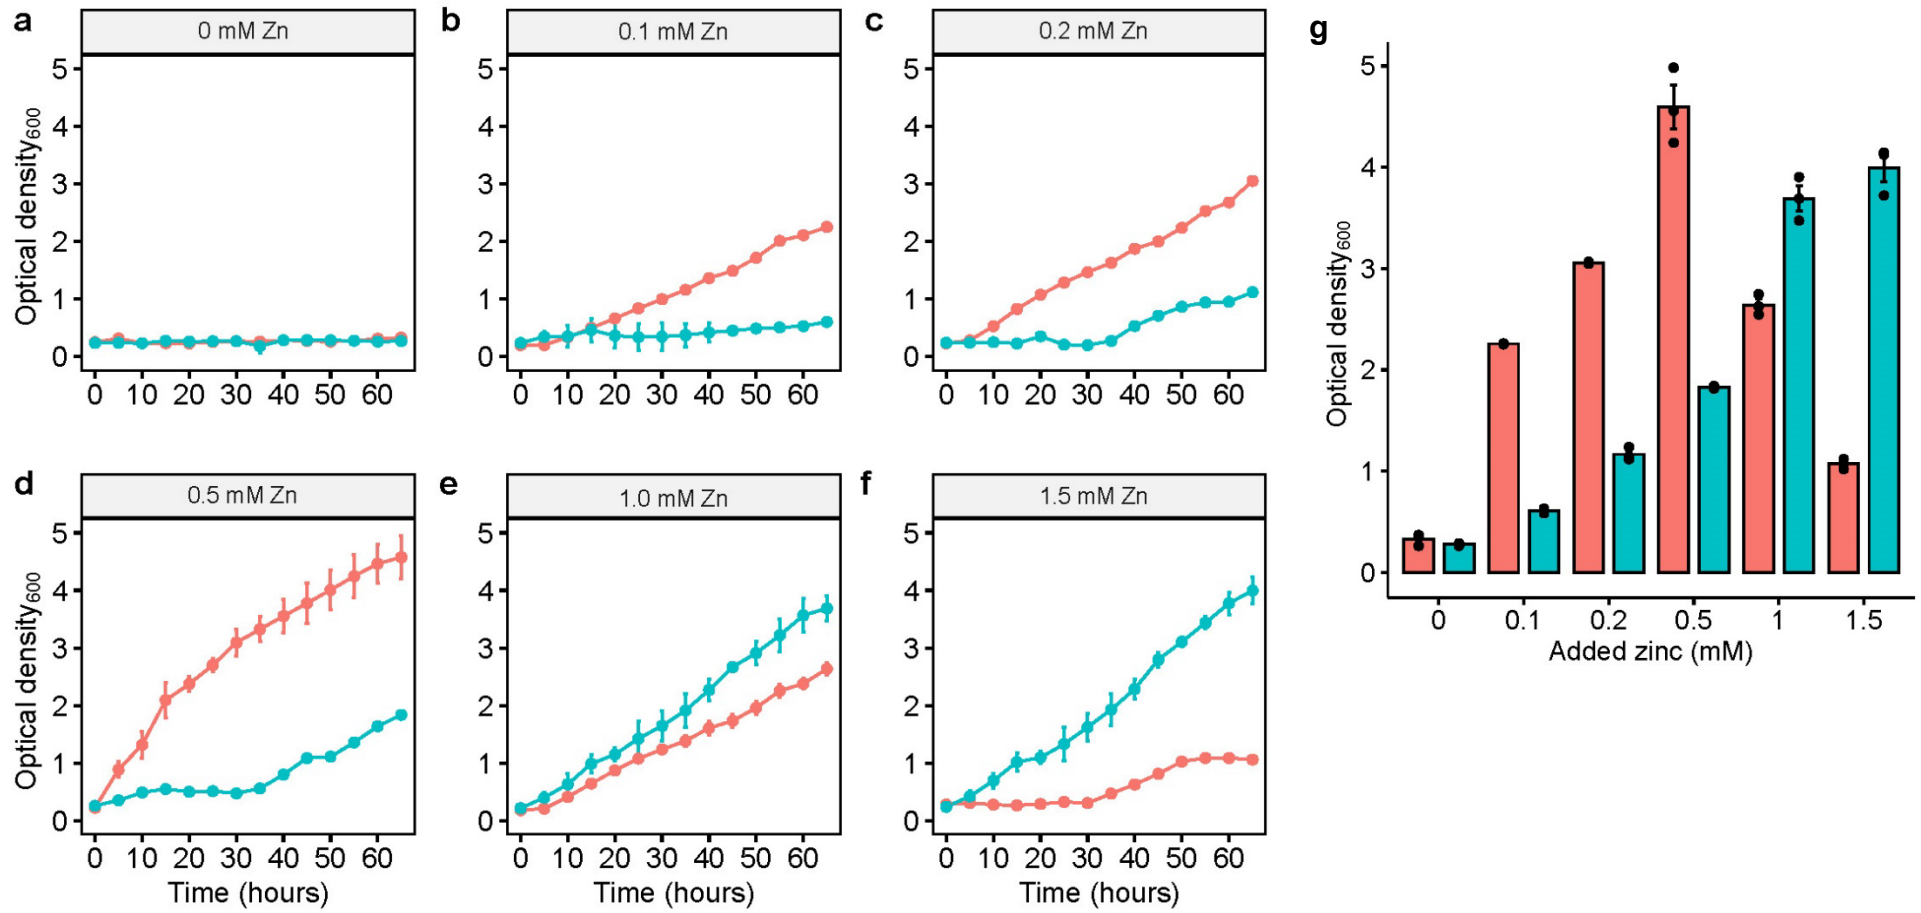

**Figure 3.** Complementation of the Zn transporter (*zrt1zrt2*) mutant (ZHY3) yeast strain with MtZIP14 (pink), or with the empty vector pDEST52 (blue), grown over a 66 h period in liquid YNB -uracil media with 2% galactose and 1 mM EDTA. With the addition of EDTA only (a), there was no growth of any yeast strains without Zn supplementation. The Zn supplementation treatments were 0.1 (b), 0.2 (c), 0.5 (d), 1.0 (e) and 1.5 (f) mM ZnSO<sub>4</sub>. After 66 h of growth the final OD<sub>600</sub> all treatments was recorded (g). Values are mean ± standard deviation of the mean, *n*=3.

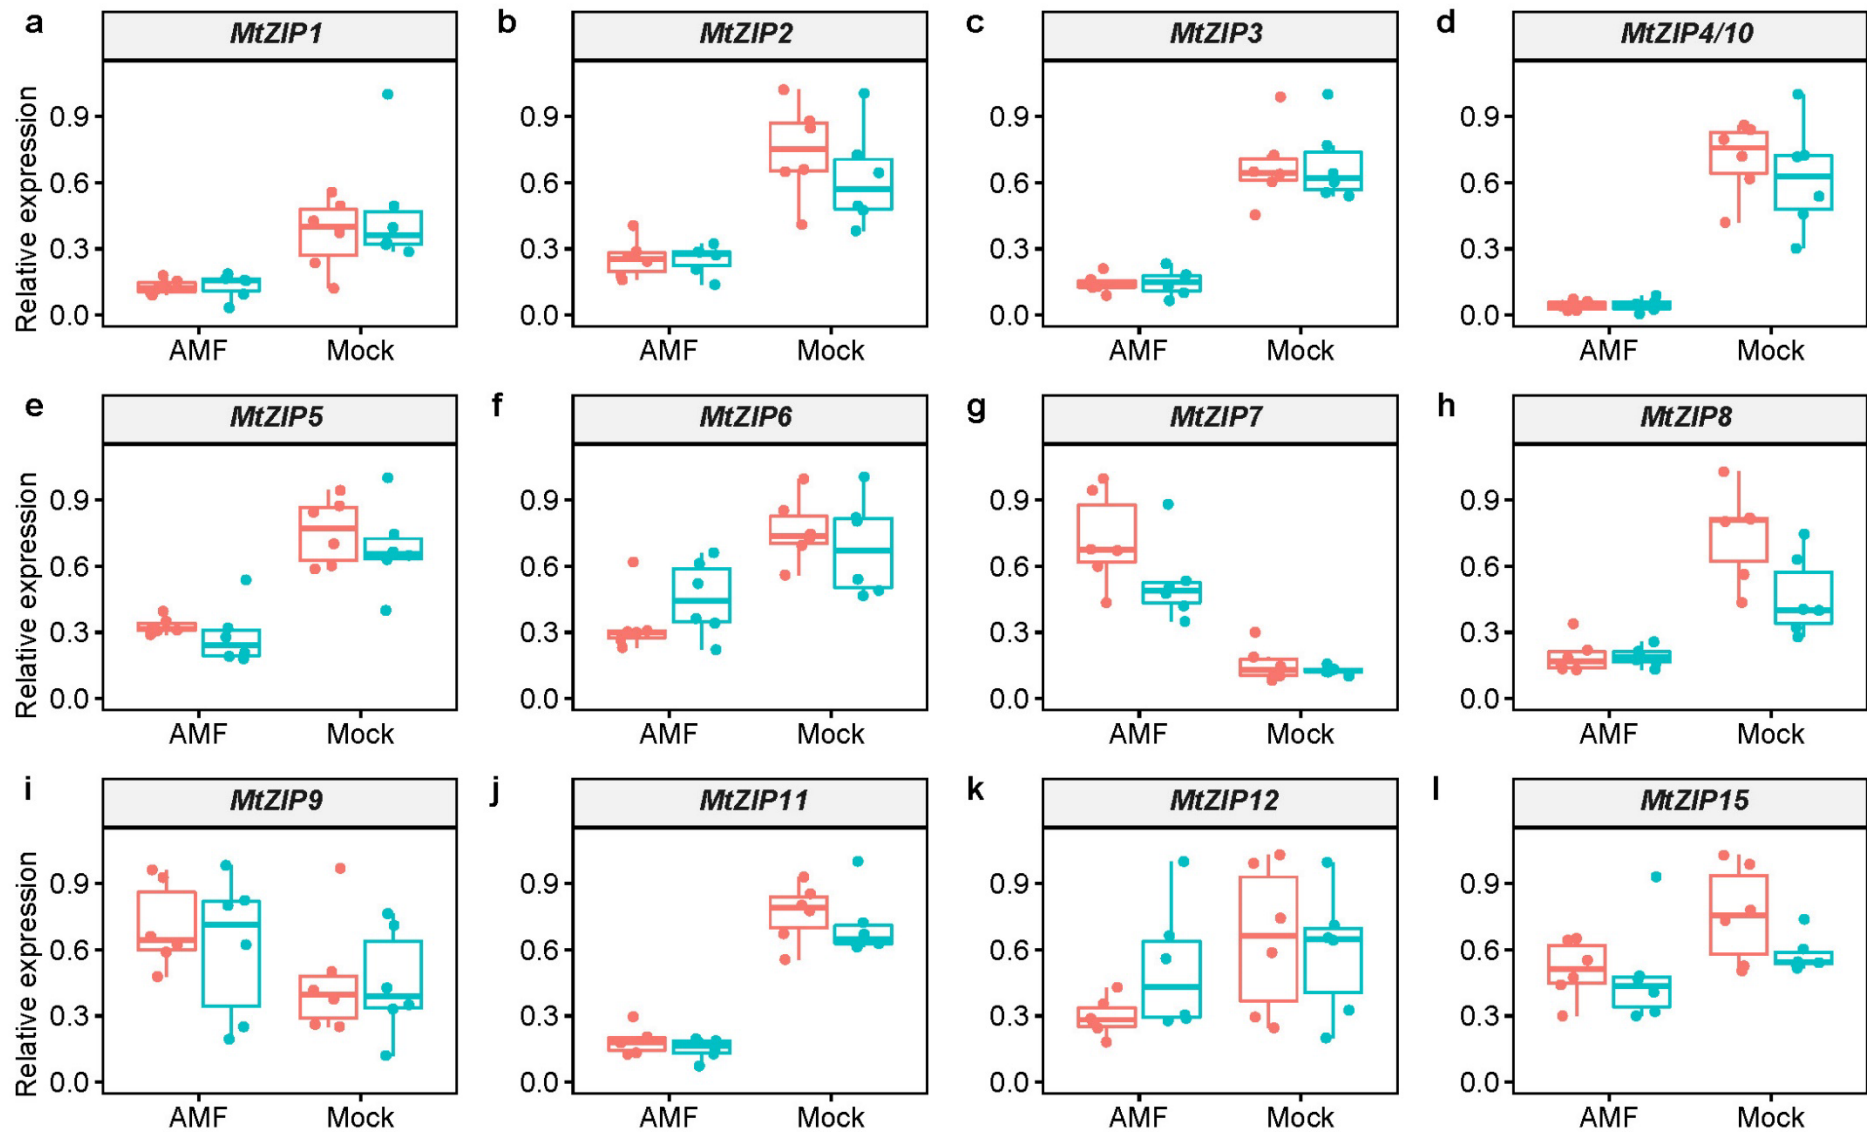

**Figure 4.** Expression of 12 ZIP transporter genes (a-j), in the roots in the *mtzip14* (pink) and segregating WT (blue) plants grown with or without inoculation by the AM fungus *Rhizophagus irregularis*. Gene expression is calculated as the gene-of-interest relative to the geometric mean of two housekeeping genes (Table S5).

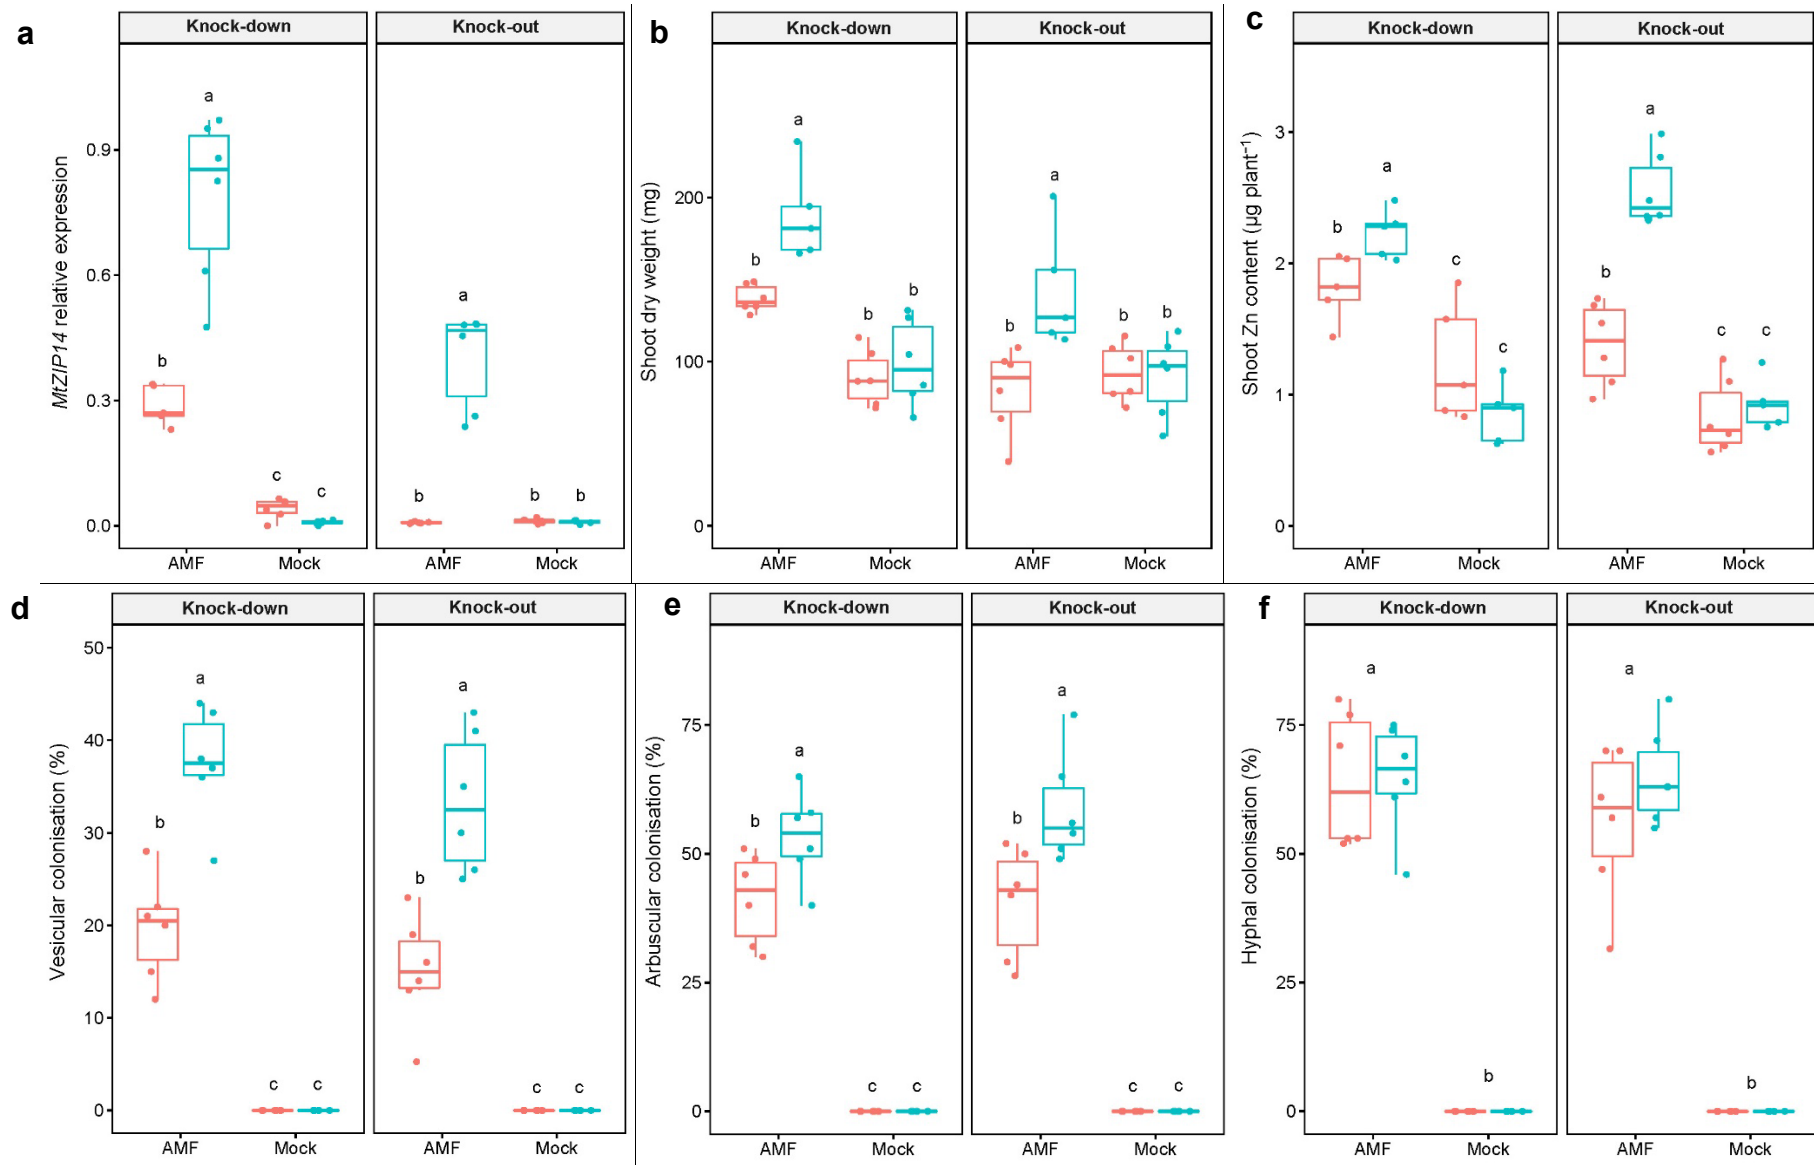

**Figure 5.** Root expression of *MtZIP14* (a), shoot dry weight (mg) (b), shoot Zn content ( $\mu\text{g Zn plant}^{-1}$ ) (c), root length colonised by AM fungus *Rhizophagus irregularis* in terms of percentage vesicles (d), arbuscules (e) and internal hyphae (f) in the knock-out and knock-down *mtzip14* (pink) and segregating WT (blue) lines grown with or without inoculation by the AM fungus *R. irregularis*. Means with different letters are considered significantly different ( $P < 0.05$ ) as per Tukey's HSD *post hoc* test. Where one letter appears above two boxes, it represents a significant main effect of *Mycorrhiza* where the two genotypes are pooled. Gene expression is calculated as the gene-of-interest relative to the geometric mean of two housekeeping genes (Table S5).

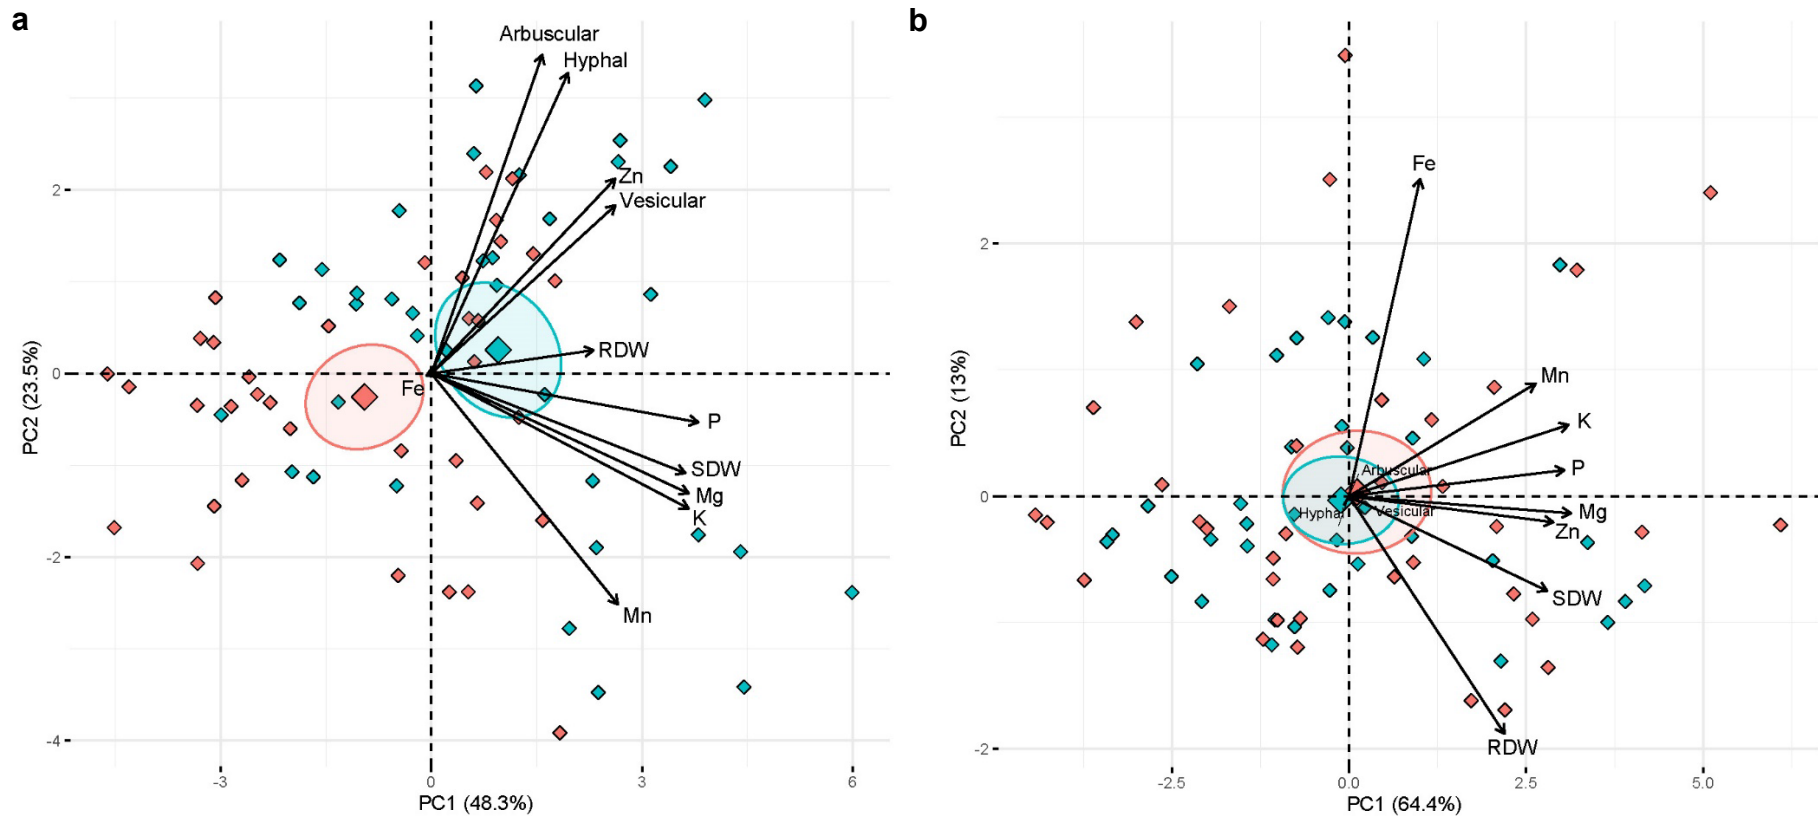

**Figure 6.** Principal components analysis (PCA) biplot displaying scores in the first two principal components (PC1: x-axis, PC2: y-axis) following PCA of biomass (shoot and root dry weights), shoot nutrient contents ( $\mu\text{g plant}^{-1}$ ; Zn, P, Mg, K, Mn, Fe) and arbuscular mycorrhizal colonisation (arbuscular, vesicular, hyphal) response variables of *mtzip14* mutant plants (pink) and segregating wild-type plants (blue) grown in three replicated experiments. Plants were either inoculated with the arbuscular mycorrhizal fungus *Rhizophagus irregularis* (a) or mock-inoculated (b). The sign and magnitude of the contribution of variables is indicated by the loadings (arrows). The large diamonds signify the mean and 95 % confidence ellipse for each *Genotype* treatment.
